# Supplementary material for: The pharmacokinetics of dexmedetomidine in patients with obstructive jaundice: A clinical trial
Source: PLoS One. 2018 Nov 14;13(11):e0207427. doi: 10.1371/journal.pone.0207427 (PMC6235379; doi:10.1371/journal.pone.0207427)
Supplement: S2 File — (XLSX) [file pone.0207427.s002.xlsx]

## Sheet: groups
Group	No.	Admission number ( AD )	Time	Name	Gender（M/F）	Age(year)	Height（cm）	Weight（Kg）	Total bilirubin(TBil)	ALT	AST	Albumin (g/L)	SCR (mmol/L)	BUN (mmol/L)	INR	PT (sec)
Obstructive jaundice group	A	171667	20150921	张*娥	女	61	158	60	228.2	210	182	38.2	69	5.67	1.05	10.7
	D	171811	20150925	王*凤	女	50	154	64	177.4	26	31	35.6	38	3.49	0.9	10.8
	E	171810	20150928	陈*妹	女	61	150	50	186.3	43	44	36.7	44	5.8	0.75	9.2
	F	172440	20151020	叶*标	男	48	163	52	42.9	153	88	42.9	77	6.12	0.96	10
	H	170491	20151026	杨*娟	女	65	153	63	51.3	35	37	35.3	44	3.1	0.84	10.1
	I	173775	group	龚*芳	女	63	151	62	173.1	91	166	31.7	59	5.45	1.03	12.4
	J	173871	20151119	李*洪	女	60	164	61	95.7	318	104	38.8	97	10.4	0.8	9.7
	K	173957	20151125	吴*万	男	54	159	67	119.4	74	35	38.7	61	3.72	1.06	10.8
	O	173185	20151203	裴*	男	55	165	65	87.2	252	219	36.2	64	3.74	1.02	12.2
	P	174693	20151207	夏*英	女	67	153	49	190.9	162	90	38.4	67	3.69	0.83	10
	Q	174592	20151211	李*庆	男	50	170	66	30.2	55	23	37.2	61	5.22	0.96	11.5
	S	132785	20151223	朱*生	男	43	164	63.5	132.9	139	83	35.8	68	6.27	0.87	10.5
	W	175113	20151228	王*川	男	50	165	63	61.1	89	35	36.2	53	5.21	0.97	10.1
	Y	175257	20151229	吴*柯	男	67	170	70	110.2	89	37	37	63	4.21	0.92	9.9
	β	175614	20151231	李*本	男	63	165	81	95.3	190	98	41.4	79	4.81	0.85	10.3
	γ	175571	20151231	孙*素	女	63	163	53	136.3	723	478	41	59	5.24	0.9	10.9
Control group	B	171630	20150924	李*俊	女	69	153	50	11.7	62	68	17.5	52	3.24	0.96	11.5
	C	171866	20150925	周*芳	女	65	161	59	17	20	16	40.7	46	3.76	0.82	10
	G	173044	20151023	陈*英	女	63	160	52	12.5	15	17	39.2	52	5.89	0.83	10
	L	174283	20151126	潘*兰	女	51	151	51.5	6.8	22	20	40.9	66	4.53	0.97	11.6
	M	174266	20151201	张*云	女	64	152	50.2	6.3	64	50	37.3	36	4.19	1.21	10
	N	174535	20151202	林*裕	男	57	167	84	9.6	26	23	42.4	85	3.86	0.92	11
	T	175377	20151223	彭*根	男	60	161	56	16.5	16	19	46.6	64	7.01	0.88	10.6
	X	175451	20151228	赖*利	男	62	164	74	17.1	40	34	50.6	85	7.04	1.14	10
	Z	175225	20151229	张*	女	64	170	54	5.9	17	23	27.6	56	2.13	1.16	13
	α	175552	20151230	高*娟	女	54	163	76	10.9	35	28	35	70	3.6	0.99	12.9
	δ	175793	20160107	余*仁	男	67	163	65	16.8	-	-	44.6	74	5.71	1.01	10.8

## Sheet: （MAP）
MAP（mmHg）	No.	Name	Time（min）	0	15	30	45	60	75	90	105	120	135	150	165	180	195	210	225	240	255	270	285	300	315	330	345	360
Group			Time point	1	2	3	4	5	6	7	8	9	10	11	12	13	14	15	16	17	18	19	20	21	22	23	24	25
Obstructive jaundice group	A	张*娥	MAP	104.333	100	77	71.6667	75.3333	63.6667	84	98.6667	79.6667	74.3333	99	84	89	85.3333	107.667	106	95	100.333	91.3333	100.667	98.3333	94.6667	102
	D	王*凤	MAP	96.3333	86.6667	74	82	99.3333	98.6667	89	94.3333	101	101.667	95	98.6667
	E	陈*妹	MAP	80.6667	83.3333	79.3333	84	94	99.3333	99.3333	92.6667	95	90.6667	91	83.6667	78.6667	77.6667	84.6667	90
	F	叶*标	MAP	100	68.6667	74.6667	81.3333	80	87	98.6667	110	93.6667	92.3333	97	80.3333	83	81	84	79.6667	79.3333	96.6667	85.6667	86.6667	82	90	115	105
	H	杨*娟	MAP	100	77.3333	67.3333	86.6667	81.6667	95.3333	95.6667	79.3333	83.6667	100.333	96.6667	104	101.333	98	82	78	83.3333	71.3333	84.3333	84.6667	68.6667	73.3333
	I	龚*芳	MAP	103.333	100.333	75	73.3333	78.3333	79.6667	94.3333	84.3333	81.6667	86	82
	J	李*洪	MAP	73.6667	73	73.6667	74.6667	79	75.3333	90.6667	92.3333	90.6667	95.3333	97	97
	K	吴*万	MAP	91.6667	82.6667	81	84.3333	90	95.3333	93.6667	92	85	94.6667	90	83.3333	85	75.3333	77.3333	78	80	83.6667
	O	裴*	MAP	93.3333	75	70.6667	79	86.6667	96.6667	96.3333	80.6667	88	83.3333	102.667	87.6667	86.3333	73.3333	87	81.6667	88	86.6667
	P	夏*英	MAP	76.3333	68.6667	62.6667	73.3333	80	86.3333	71.3333	70	65.6667	60	82.6667	71.6667	86.3333	77.3333	87	100
	Q	李*庆	MAP	80	85.3333	81.6667	79.6667	86	93.6667	88.3333	103.333	80	73.3333	76	78	76.6667	75.3333	86.6667	95	95.6667	105
	S	朱*生	MAP	82	71.6667	72	72.6667	64	63.6667	67.6667	61	83.3333
	W	王*川	MAP	84.3333	79	99.3333	71.6667	94.6667	65.3333	78	76.6667	87.6667	82	82	83	77.3333	81.3333	86.6667	74	67.3333	67.3333	73.6667	85.3333	93.3333	83.3333	88.3333
	Y	吴*柯	MAP	78.6667	86	81.6667	75.3333	73.3333	82	95.6667	85.3333	87.6667	91.6667	82.6667	88.6667	73.3333	79.3333	80	71.3333	72.3333	84.3333	81.6667	99.3333
	β	李*本	MAP	96	91.3333	82	94	93.6667	92.6667	92.3333	91	100	84.6667	92	89.3333	85.3333	77	83	94	91.3333	89.3333
	γ	孙*素	MAP	102	68	68	68	67.3333	67.3333	76.6667	67.3333	65.3333	65	70.6667	68.3333	70.6667	71.3333	71	100.333	100	78	67.6667	80.6667	66.3333	62.6667	92.3333	90	91
Control group	B	李*俊	MAP	96.3333	75.3333	67.6667	68.6667	75.3333	77	87.3333	76	98.6667	77.6667	66.6667	67.6667	81.3333	90	64.6667	73.6667	72	75.3333	80.6667
	C	周*芳	MAP	103.333	78.3333	72.6667	82.6667	77	96	101.667	103	98	91.6667	89.3333	110.667
	G	陈*英	MAP	98	103.333	75	82.6667	82	79.3333	85.6667	98	101	73.3333	86.6667
	L	潘*兰	MAP	86	75.3333	81.3333	77	93.6667	95.3333	91.3333	96	94.3333	90	81.3333	82.3333	84.3333	84.3333	84	84	90	87.3333
	M	张*云	MAP	82.6667	77.3333	78.3333	66.6667	93.3333	90.6667	86.3333	89.6667	79.3333	66.6667	68.3333	62.6667	61.3333	108.333	68	78	77.3333	78.3333	69.6667	70.3333	88.6667	99.3333	85.3333	89.3333	100.333
	N	林*裕	MAP	90.3333	75.6667	56.6667	80.6667	74.3333	64.6667	61.6667	68.3333	66.6667	68	72
	T	彭*根	MAP	109.333	93.3333	86.3333	88.6667	87.3333	85.3333	77.3333	85.6667	92	92	88.6667	100
	X	赖*利	MAP	77.6667	72.6667	84	86	86	86	89.3333	87	68.6667	81.3333	86.6667	64.6667	83.6667	90.6667	72	77.3333	76.6667	71.3333	76.3333	78	72
	Z	张*	MAP	96.6667	80.6667	83.3333	87.3333	101	94	92	106.333	94.6667	93.6667
	α	高*娟	MAP	92.6667	99	73.3333	90	65.3333	71.6667	82.3333	75	70.3333
	δ	余*仁	MAP	82	80	58.3333	85	76.6667	93.3333	90.3333	97.3333	85.3333	89.3333	69.3333	70.3333	85.6667	84.3333	79.6667	75.6667	89	90	92

## Sheet: concentration
Sample number	Planned time		Obstructive jaundice group			Obstructive jaundice group			Obstructive jaundice group			Obstructive jaundice group			Obstructive jaundice group			Obstructive jaundice group			Obstructive jaundice group			Obstructive jaundice group			Obstructive jaundice group			Obstructive jaundice group			Obstructive jaundice group			Obstructive jaundice group			Obstructive jaundice group			Obstructive jaundice group			Obstructive jaundice group			Obstructive jaundice group
			1			2			3			4			5			6			7			8			9			10			11			12			13			14			15			16
			A			D			E			F			H			I			J			K			O			P			Q			S			W			Y			β			γ
	Planned time（min）	Planned time（sec）	Actual time（m's"）	Actual time（s）	Concentration（ng/ml）	Actual time（m's"）	Actual time（s）	Concentration（ng/ml）	Actual time（m's"）	Actual time（s）	Concentration（ng/ml）	Actual time（m's"）	Actual time（s）	Concentration（ng/ml）	Actual time（m's"）	Actual time（s）	Concentration（ng/ml）	Actual time（m's"）	Actual time（s）	Concentration（ng/ml）	Actual time（m's"）	Actual time（s）	Concentration（ng/ml）	Actual time（m's"）	Actual time（s）	Concentration（ng/ml）	Actual time（m's"）	Actual time（s）	Concentration（ng/ml）	Actual time（m's"）	Actual time（s）	Concentration（ng/ml）	Actual time（m's"）	Actual time（s）	Concentration（ng/ml）	Actual time（m's"）	Actual time（s）	Concentration（ng/ml）	Actual time（m's"）	Actual time（s）	Concentration（ng/ml）	Actual time（m's"）	Actual time（s）	Concentration（ng/ml）	Actual time（m's"）	Actual time（s）	Concentration（ng/ml）	Actual time（m's"）	Actual time（s）
0	0	0	0'00	0	0.0154	0'00	0	-	0'00	0	0.0174	0'00	0	0.0152	0'00	0	0.0123	0'30	30	1.1641	0'34	34	2.0961	0'25	25	0.6664	0'23	23	0.1101	0'26	26	1.8945	0'25	25	1.2141	0'25	25	0.8695	0'26	26	1.1373	0'26	26	0.7746	0'26	26	1.30343	0'25	25
1	1	60	1'08	68	4.7874	1'29	89	1.0288	1'04	64	1.0578	1'07	67	0.6448	1'02	62	1.7621	1'10	70	0.9712	1'19	79	1.8545	0'58	58	1.9549	0'59	59	1.4961	0'58	58	2.0386	0'58	58	0.3228	1'06	66	0.6738	1'00	60	1.5271	1'05	65	0.5739	1'01	61	0.5889	0'59	59
2	2	120	2'05	125	4.9976	2'14	134	1.8842	2'06	126	1.6262	2'03	123	1.691	1'57	117	0.7035	2'15	135	1.3686	2'10	130	2.177	1'59	119	1.5284	1'54	114	1.6779	1'55	115	3.7064	1'55	115	1.1301	1'59	119	1.2188	1'55	115	2.1058	2'02	122	0.8954	1'51	111	1.03989	2'00	120
3	3	180	3'09	189	2.5941	3'13	193	1.7645	3'05	185	2.1182	3'18	198	-	3'04	184	1.6818	3'05	185	1.7881	3'06	186	2.751	2'56	176	2.2149	2'55	175	2.6002	3'06	186	2.9611	3'05	185	1.2649	2'54	174	1.3863	3'05	185	2.014	3'02	182	1.0518	3'01	181	1.63106	3'02	182
4	5	300	5'05	305	4.3341	5'13	313	1.9037	5'00	300	1.955	5'12	312	2.655	5'02	302	2.02	5'12	312	1.9516	4'59	299	3.5926	4'58	298	1.9955	5'01	301	3.3667	4'59	299	4.7361	5'00	300	2.3598	4'50	290	1.7305	5'05	305	4.513	5'01	301	1.5218	5'05	305	2.33513	5'05	305
5	10	600	10'06	606	3.2184	9'45	585	2.6418	10'07	607	0.3897	10'00	600	1.777	10'15	615	3.0679	9'58	598	2.5356	9'57	597	2.3205	9'57	597	3.4546	10'01	601	2.4254	9'56	596	6.1206	10'01	601	2.9864	9'55	595	3.5629	10'03	603	4.2775	10'01	601	3.2104	10'10	610	2.77285	9'47	587
6	12	720	12'14	734	2.7733	11'55	715	2.1651	12'06	726	0.8711	12'03	723	1.082	12'01	721	2.1554	12'10	730	1.0362	12'04	724	1.4903	11'56	716	1.7185	12'01	721	1.3487	12'16	736	3.017	12'03	723	2.3581	11'50	710	1.4429	12'07	727	2.9536	12'01	721	1.8249	12'02	702	1.41433	12'00	720
7	14	840	15'24	924	1.6356	14'30	870	1.3055	14'05	845	0.7535	14'03	843	1.1107	14'02	842	1.0442	13'58	838	0.699	14'01	841	1.3458	14'19	859	1.2965	14'03	843	0.9831	13'58	838	2.1094	14'02	842	0.9744	13'55	835	1.0866	13'56	836	1.5077	13'59	939	1.3326	14'05	845	1.08602	13'56	836
8	15	900	16'14	974	1.7139	15'20	920	0.8366	15'15	915	0.5308	15'20	920	1.0614	15'20	920	0.7792	15'07	907	0.7267	15'03	903	1.0311	15'15	915	1.2892	14'59	899	0.9804	15'05	905	1.695	14'51	891	0.8584	15'01	901	1.2155	14'53	893	1.3508	15'02	902	1.8568	14'58	898	0.90645	15'09	909
9	20	1200	20'13	1213	1.3028	19'54	1194	0.8414	19'45	1185	1.4286	19'48	1188	0.8634	20'00	1200	0.7483	19'48	1188	0.3846	19'58	1258	0.6997	20'05	1205	1.0176	20'08	1208	0.6078	20'20	1220	1.3124	20'18	1218	1.2493	19'47	1187	0.8922	19'44	1184	0.8276	20'20	1220	0.7892	20'00	1200	0.9527	19'55	1195
10	25	1500	24'54	1494	0.9885	24'51	1491	0.8104	24'52	1492	3.1358	25'06	1506	0.4732	25'08	1508	0.5388	24'50	1490	0.4781	25'01	1501	0.7764	25'24	1524	1.1257	25'02	1502	0.6334	25'00	1500	0.6691	25'08	1508	0.4952	25'05	1505	0.5255	24'45	1485	0.4615	25'00	1500	0.8203	25'26	1526	0.50079	24'50	1490
11	30	1800	29'40	1780	0.9155	29'54	1794	0.4174	30'01	1801	0.7434	30'00	1800	0.5016	30'00	1800	0.5609	29'46	1786	0.3886	29'57	1793	0.7883	30'00	1800	0.534	30'00	1800	0.5901	29'50	1790	0.6718	29'40	1780	0.5997	29'20	1760	0.4688	30'04	1804	0.4543	29'47	1787	0.4615	29'48	1788	0.35528	30'00	1800
12	40	2400	39'16	2356	0.6579	40'04	2404	0.4787	41'30	2490	0.4131	39'54	2394	0.5782	40'30	2430	0.5733	39'49	2389	0.2447	40'14	2414	0.4941	40'06	2406	0.5531	40'20	2420	0.6914	40'00	2400	0.7066	40'09	2409	0.6046	40'00	2400	0.4347	40'10	2410	0.4422	40'03	2403	0.4626	39'40	2340	0.32668	42'22	2542
13	60	3600	59'04	3544	0.514	60'15	3615	0.3619	60'00	1800	0.3493	59'50	3590	0.4181	60'30	3630	0.3667	60'02	3602	0.2445	59'50	3590	0.3044	60'00	3600	0.3036	59'59	3599	0.4664	59'58	3598	0.5971	59'58	3598	0.4357	59'42	3582	0.3715	59'59	3599	0.3721	59'57	3597	0.2442	60'17	3617	0.24077	60'03	3603
14	70	4200	70'05	4205	0.6102	71'05	4265	0.369	70'30	4230	0.3444	69'57	4197	0.3983	70'34	4234	0.2746	71'26	4286	0.2109	69'54	4194	0.3147	70'04	4204	0.3236	70'40	4240	0.6646	70'05	4205	0.5344	70'16	4216	0.3369	70'24	4224	0.3655	69'55	4195	0.7283	71'16	4276	0.4119	70'10	4210	0.21612	69'57	4197
15	90	5400	90'03	5403	0.4217	91'00	5460	0.2648	90'23	5423	0.2922	89'41	5381	0.2234	90'15	5415	0.259	90'40	7240	0.2281	90'03	5403	0.2532	89'59	5399	0.324	90'13	5413	0.6765	90'13	5413	0.5516	89'57	5397	0.2576	89'55	5395	0.2853	90'00	5400	0.3849	90'36	5436	0.2924	90'05	5405	0.2308	91'37	5497
16	120	7200	120'30	7230	0.4222	120'10	7210	0.2895	120'20	7220	0.2384	120'04	7204	0.217	121'05	7265	0.4568	120'05	7205	0.199	118'10	7090	0.3397	119'57	7197	0.3126	121'50	7310	0.4131	120'05	7205	0.4562	119'58	7198	0.215	119'40	7180	0.3142	119'50	7190	0.3166	120'00	7200	0.3437	120'05	7205	0.17424	120'27	7227
17	150	9000	150'30	9030	0.3077	155'25	9325	0.2194	151'00	9060	0.2878	153'50	9230	0.2463	150'25	9025	0.3299	150'00	9000	0.2041	150'20	9020	0.2156	149'59	8999	0.2976	150'08	9008	0.3587	150'02	9002	0.3595	150'10	9010	0.2222	151'20	9080	0.2818	150'10	9010	0.3958	150'24	9024	0.2424	150'16	9016	0.17296	150'07	9007
18	180	10800	180'01	10801	0.3377	179'59	10799	0.2058	183'04	10984	0.1714	176'40	10600	0.2292	180'04	10804	0.3051	180'50	10850	0.1984	180'00	10800	0.183	179'52	70792	0.252	179'39	10779	0.3271	186'00	11160	0.1889	180'30	10830	0.2271	179'30	10770	0.2702	179'57	10797	0.2764	179'57	10797	0.1864	180'02	10802	0.10433	180'43	10843
19	240	14400	240'20	14420	0.3066	251'40	15100	0.221	241'00	14460	0.1074	240'00	14400	0.1657	243'00	14580	0.2606	240'50	14450	0.1256	240'00	14400	0.1291	240'30	14430	0.1949	239'31	14371	0.206	238'00	14280	0.1401	239'26	14366	0.1505	240'10	14410	0.175	239'59	14399	0.1678	240'03	14403	0.1716	239'31	14371	0.0999	239'10	14350
20	300	18000	299'50	17990	0.1115	301'00	18060	0.2037	297'28	17848	0.1901	299'50	17990	0.1442	300'10	18010	0.1226	300'30	18030	0.127	300'00	18000	0.1304	275'00	16500	0.1829	302'00	18120	-	308'00	18480	0.1047	300'00	18000	0.1703	297'35	17855	0.136	302'02	18122	0.1024	298'09	17889	0.1926	-	-	-	-	-
[truncated: 34 more columns]

## Sheet: pk
Group	Parameters	TBL	Clearance（CL.)	Clearance constant	T1/2	Tmax	Cmax	AUC 0-t	AUC 0-inf_obs	MRT 0-inf_obs	Vz_obs
	No.	μmol/L	L/kg/min	1/min	min	min	ng/ml	ng/ml*min	ng/ml*min	min	(μg/kg)/(ng/ml)
Obstructive jaundice group	A	228.2	0.00531716	0.00590752	117.333	2	4.9976	169.196	188.07	119.305	0.900065
	D	177.4	0.00559099	0.00294244	235.569	10	2.6418	109.631	178.859	303.33	1.90012
	E	186.3	0.00817008	0.00654916	105.838	3	2.1182	93.3712	122.398	171.913	1.2475
	F	42.9	0.00890476	0.00446124	155.371	3	2.655	79.9766	112.299	182.083	1.99603
	H	51.3	0.00693668	0.00683935	101.347	10	3.0679	126.235	144.161	138.972	1.01423
	I	173.1	0.00788001	0.00283874	244.174	10	2.5356	82.1652	126.903	285.484	2.77588
	J	95.7	0.00724399	0.00481459	143.968	5	3.5926	110.961	138.046	159.016	1.50459
	K	119.4	0.00552625	0.00300676	230.53	10	3.4546	120.125	180.955	269.193	1.83794
	O	87.2	0.00598699	0.00579845	119.54	5	3.3667	131.502	167.029	146.881	1.03252
	P	190.9	0.00536822	0.00491766	140.951	10	6.1206	164.991	186.281	112.561	1.09162
	Q	30.2	0.00679743	0.00490763	141.239	10	2.9864	112.413	147.114	179.553	1.38507
	S	132.9	0.0071631	0.00491083	141.147	10	3.5629	111.91	139.604	170.136	1.45863
	W	61.1	0.00689782	0.00827469	83.7672	5	4.513	132.598	144.973	103.826	0.833605
	Y	110.2	0.00606813	0.00332769	208.297	10	3.2104	106.917	164.795	267.048	1.82353
	β	95.3	0.0109952	0.00636685	108.868	10	2.77285	75.2585	90.9492	112.559	1.72694
	γ	136.3	0.00378305	0.0119416	58.0446	10	4.79616	243.938	264.337	93.1197	0.316795
Control group	B	11.7	0.00783365	0.00211523	327.694	10	1.703	75.4615	127.654	367.019	3.70345
	C	17	0.00895498	0.00383164	180.901	5	2.6842	87.6852	111.67	178.438	2.33711
	G	12.5	0.00889149	0.0050062	138.458	10	3.4427	91.1935	112.467	153.56	1.7761
	L	6.8	0.0101157	0.00445868	155.46	5	2.7602	81.1602	98.856	159.683	2.26877
	M	6.3	0.0123447	0.00484625	143.028	10	2.7715	56.9669	81.0061	143.057	2.54728
	N	9.6	0.00891974	0.0067592	102.549	5	2.5989	76.0415	112.111	205.18	1.31965
	T	16.5	0.00866984	0.0113721	60.9515	10	1.9554	103.225	115.342	104.747	0.762377
	X	17.1	0.00509192	0.00451194	153.625	3	11.1831	165.272	196.39	103.867	1.12854
	Z	5.9	0.00981028	0.00692369	100.112	10	2.5009	82.8256	101.934	126.563	1.41691
	α	10.9	0.0149356	0.0067245	103.078	10	2.46007	58.2114	66.9541	94.5317	2.22107
	δ	16.8	0.0169435	0.00624091	111.065	2	1.94675	50.0226	59.0197	109.517	2.71491
